# Supplementary material for: Elucidating ozone and PM 2.5 pollution in Fenwei Plain reveals the co-benefits of controlling precursor gas emissions in winter haze
Source: Copernicus journal article supplement (doi:10.5194/egusphere-2022-1440), 2022-12-21
Supplement: Supplementary file 1 [file egusphere-2022-1440-supplement.pdf]

Supplementary for

**Elucidating ozone and PM<sub>2.5</sub> pollution in Fenwei Plain reveals the co-benefits of controlling precursor gas emissions in winter haze**

Chunshui Lin<sup>1</sup>, Ru-Jin Huang<sup>1,2,3,4\*</sup>, Haobin Zhong<sup>1,5</sup>, Jing Duan<sup>1</sup>, Zixi Wang<sup>3,6</sup>, Wei Huang<sup>1</sup>, and Wei Xu<sup>1</sup>

<sup>1</sup>State Key Laboratory of Loess and Quaternary Geology (SKLLQG), Center for Excellence in Quaternary Science and Global Change, Institute of Earth Environment, Chinese Academy of Sciences, Xi'an 710061, China

<sup>2</sup>Institute of Global Environmental Change, Xi'an Jiaotong University, Xi'an 710049, China

<sup>3</sup>University of Chinese Academy of Sciences, Beijing 100049, China

<sup>4</sup>Laoshan Laboratory, Qingdao 266061, China

<sup>5</sup>School of Advanced Materials Engineering, Jiaying Nanhu University, Jiaying 314001, China.

<sup>6</sup>State Key Laboratory of Atmospheric Boundary Layer Physics and Atmospheric Chemistry, Institute of Atmospheric Physics, Chinese Academy of Sciences, Beijing 100029, China

This document contains:

**Figure S1-S12.**

**Table S1.**

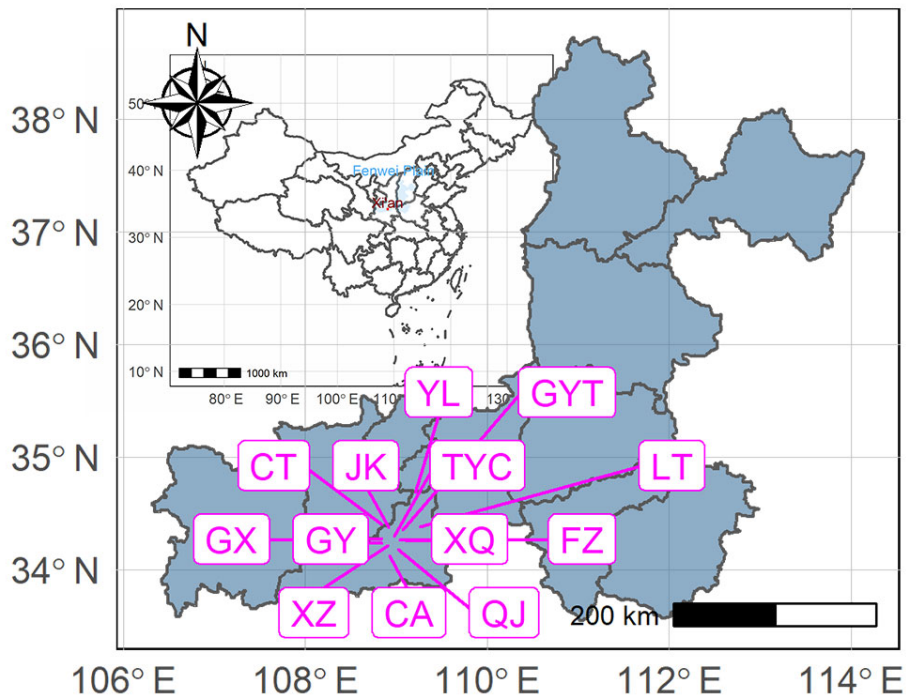

**Figure S1.** The 13 monitoring sites in urban Xi'an, the largest city in the Fenwei Plain. All 13 sampling sites are classified as urban sites within Xi'an city. GY: GaoYa kaiguanchang; XQ: XingQing community; FZ: FanZhi city; XZ: XiaoZhai; TYC: shirenmin TiYuChang; GX: GaoXin new district; JK: JingKai district; CA: ChangAn district; YL: YanLiang district; LT: LinTong district; CT: CaoTan district; QJ: QuJiang wehuachanyejituan; GYT: GuangYunTan.

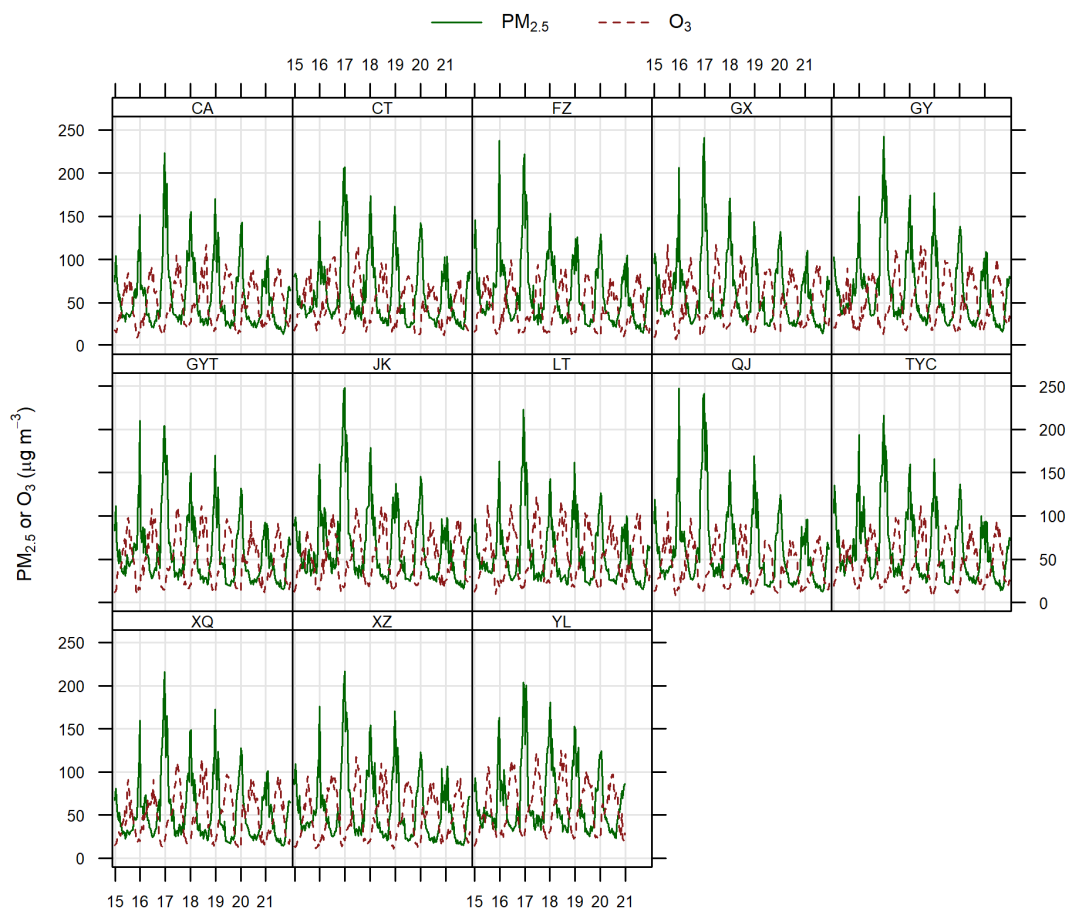

**Figure S2.** Time series of  $\text{PM}_{2.5}$  and  $\text{O}_3$  at the 13 sampling sites. The abbreviation for the sampling site is the same as in Figure S1. Data were averaged at 2 weeks for clarity reasons.

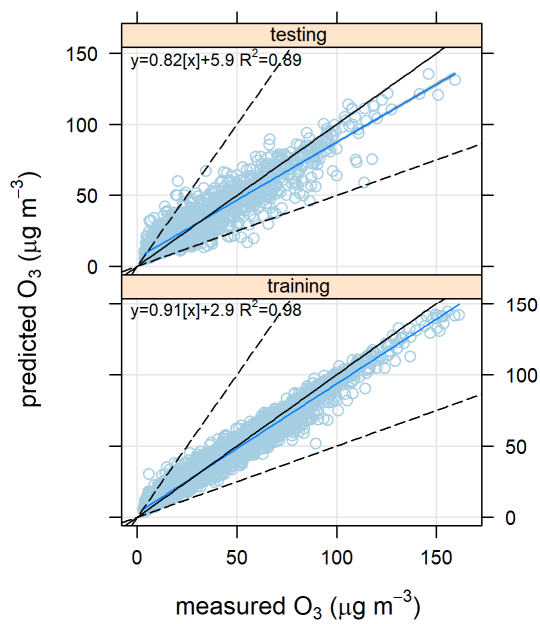

**Figure S3.** Time series correlation between the predicted and measured O<sub>3</sub> using the random forest model.

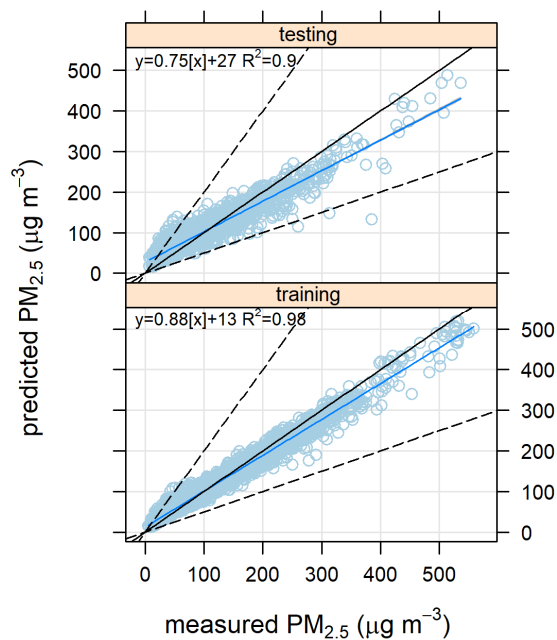

**Figure S4.** Time series correlation between the predicted and measured PM<sub>2.5</sub> using the random forest model.

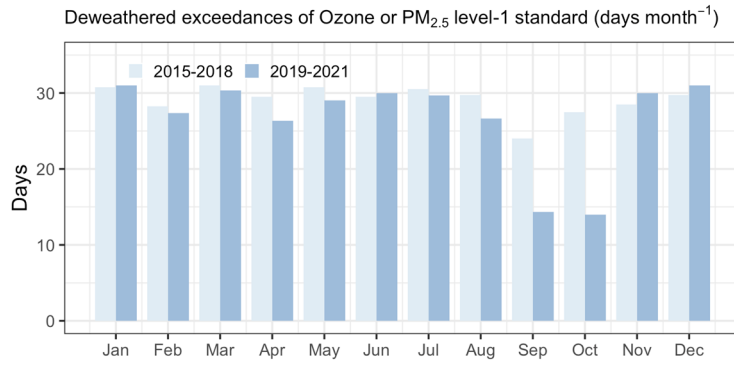

**Figure S5.** Deweathered exceedances of ozone or PM<sub>2.5</sub> level-1 standard for 2015-2018 and 2019-2021. Ozone and PM<sub>2.5</sub> were averaged from 13 monitoring sites in Xi'an with full 2015 to 2021 records.

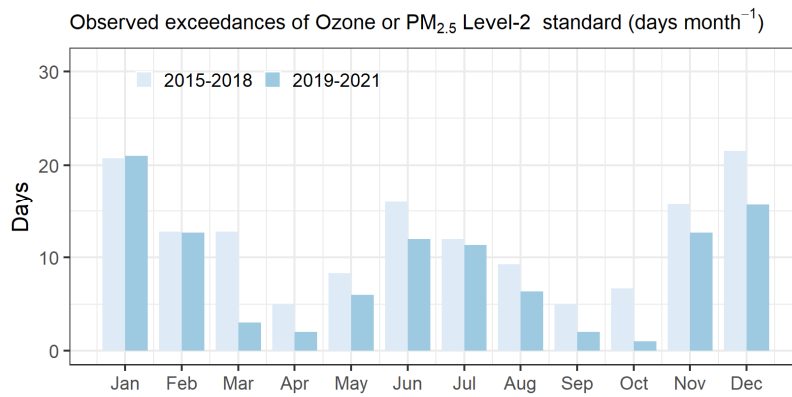

**Figure S6.** Observed exceedances of ozone or PM<sub>2.5</sub> level-2 standard for 2015-2018 and 2019-2021. Ozone and PM<sub>2.5</sub> were averaged from 13 monitoring sites in Xi'an with full 2015 to 2021 records.

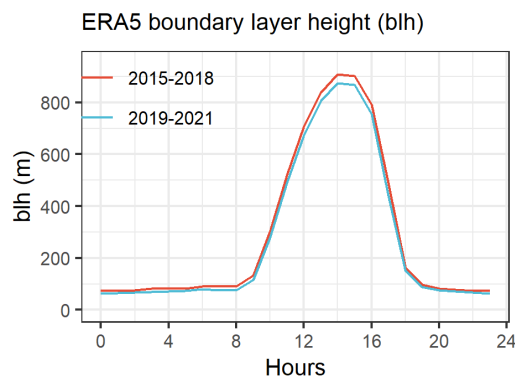

**Figure S7.** Mean boundary layer height (blh) for 2015-2018 and 2019-2021.

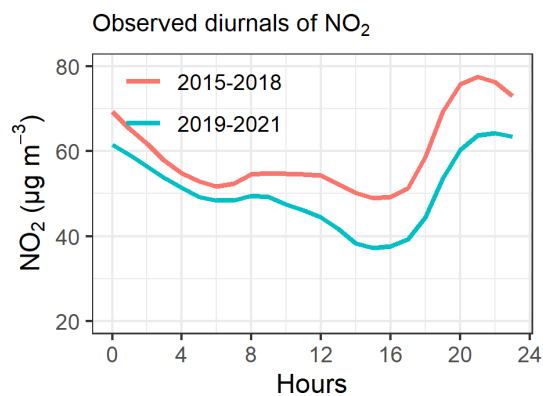

**Figure S8.** Observed diurnal of NO<sub>2</sub> in January-February for 2015-2018 and 2019-2021.

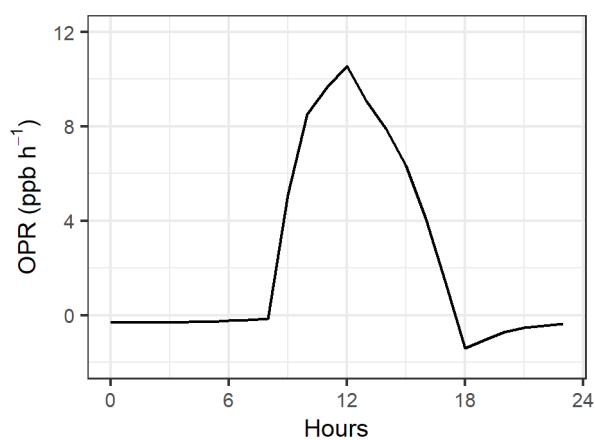

**Figure S9.** Simulated ozone production rate (OPR at ppb h<sup>-1</sup>) from 0-D box model.

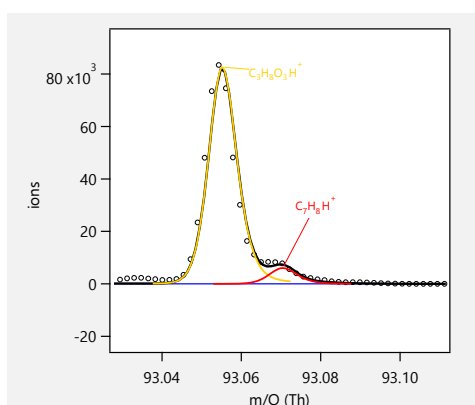

**Figure S10.** The organic ions at  $m/z$  93. Toluene ion ( $C_7H_8H^+$ ) had a strong neighbor ion, which can be hardly separated by a low-mass resolution mass analyzer.

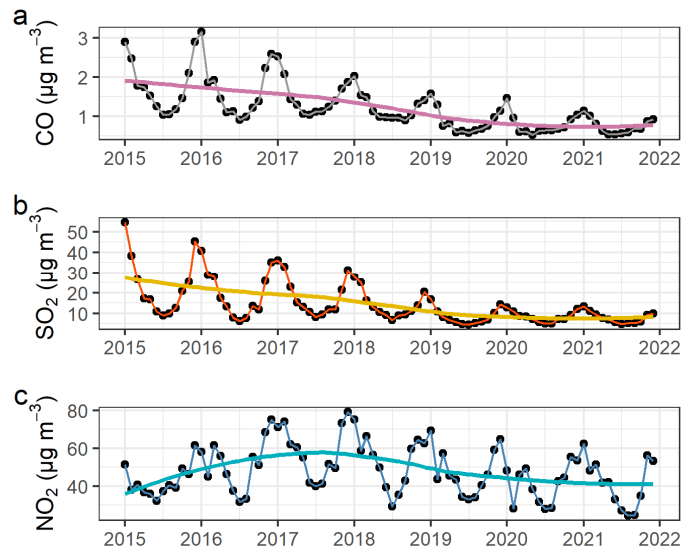

**Figure S11.** Month means of CO, SO<sub>2</sub>, and NO<sub>2</sub> from 2015 to 2022. The smooth line is fitted using a Locally Weighted Least Squares Regression.

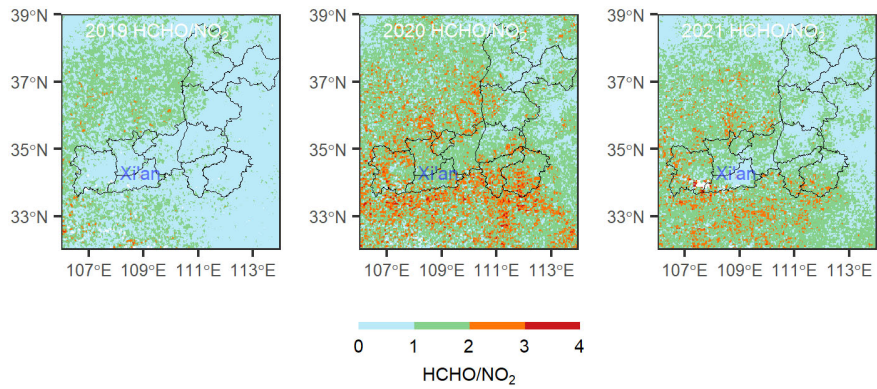

**Figure S12.** HCHO to NO<sub>2</sub> ratios (HCHO/NO<sub>2</sub>) measured by the TROPOMI satellite instrument in January-February in 2019, 2020, and 2021.

**Table S1.** Mean and one standard deviation (sd) chemical composition of non-refractory particulate matter (NR-PM<sub>2.5</sub>) and the OA factor for the winter in 2013-2014 and 2019-2021. All in  $\mu\text{g m}^{-3}$ .

| Species    | 2013-2014 | sd   | 2019-2021 | sd  |
|------------|-----------|------|-----------|-----|
| OA         | 125.4     | 78.5 | 48.1      | 6.1 |
| Sulfate    | 52.6      | 57.7 | 20.3      | 9.9 |
| Nitrate    | 34.9      | 30.9 | 17.6      | 3.0 |
| Ammonium   | 21.0      | 9.6  | 10.2      | 2.8 |
| Chloride   | 27.4      | 30.2 | 4.5       | 1.8 |
| OA factors |           |      |           |     |
| Fossil     | 37.7      | 16.4 | 8.8       | 4.7 |
| Biomass    | 33.5      | 29.4 | 9.3       | 2.7 |
| Cooking    | 19.6      | 12.0 | 3.1       | 0.7 |
| OOA        | 26.3      | 20.8 | 23.3      | 3.2 |
